# *Legionella pneumophila* multiplication is enhanced by chronic AMPK signalling in mitochondrially diseased Dictyostelium cells

Lisa Francione<sup>1</sup>, Paige K. Smith<sup>1</sup>, Sandra L. Accari<sup>1</sup>, Philip E. Taylor<sup>2</sup>, Paul B. Bokko<sup>1</sup>, Salvatore Bozzaro<sup>3</sup>, Peter L. Beech<sup>2</sup> and Paul R. Fisher<sup>1,\*</sup>

## SUMMARY

Human patients with mitochondrial diseases are more susceptible to bacterial infections, particularly of the respiratory tract. To investigate the susceptibility of mitochondrially diseased cells to an intracellular bacterial respiratory pathogen, we exploited the advantages of *Dictyostelium discoideum* as an established model for mitochondrial disease and for *Legionella pneumophila* pathogenesis. Legionella infection of macrophages involves recruitment of mitochondria to the Legionella-containing phagosome. We confirm here that this also occurs in Dictyostelium and investigate the effect of mitochondrial dysfunction on host cell susceptibility to Legionella. In mitochondrially diseased Dictyostelium strains, the pathogen was taken up at normal rates, but it grew faster and reached counts that were twofold higher than in the wild-type host. We reported previously that other mitochondrial disease phenotypes for Dictyostelium are the result of the activity of an energy-sensing cellular alarm protein, AMP-activated protein kinase (AMPK). Here, we show that the increased ability of mitochondrially diseased cells to support Legionella proliferation is suppressed by antisense-inhibiting expression of the catalytic AMPK $\alpha$  subunit. Conversely, mitochondrial dysfunction is phenocopied, and intracellular Legionella growth is enhanced, by overexpressing an active form of AMPK $\alpha$  in otherwise normal cells. These results indicate that AMPK signalling in response to mitochondrial dysfunction enhances Legionella proliferation in host cells.

## INTRODUCTION

Mitochondrial diseases are complex, degenerative disorders resulting from various mitochondrial DNA or nuclear gene mutations. Depending on which tissues are affected most severely, the phenotypic outcomes are diverse and can include diabetes, blindness, deafness, stroke-like episodes, epilepsy, ataxia, muscle weakness, exercise intolerance and kidney disease (Wallace et al., 1988; Goto et al., 1992; Tatuch and Robinson, 1993; Mackey et al., 1996; Geromel et al., 2001; Rossignol et al., 2003; McKenzie et al., 2004). A number of reports suggest that mitochondrial disease patients are more susceptible to recurrent bacterial infections, particularly of the respiratory tract (Lacbawan et al., 2000; Edmonds et al., 2002; Katsanos et al., 2002; Ogawa et al., 2003; Edmonds, 2004; Wortmann et al., 2006). However, the mechanisms that underlie such increased susceptibility have not been studied and are not understood. Here, we use the established *Dictyostelium discoideum* model for mitochondrial disease (Wilczynska et al., 1997; Kotsifas et al., 2002; Chida et al., 2004; Torija et al., 2006; Barth et al., 2007) and for *Legionella pneumophila* pathogenesis (Hägele et al., 2000; Solomon et al., 2000; Skriwan et al., 2002; Hilbi et al., 2007) to show that intracellular proliferation of the bacterial pathogen is supported better by mitochondrially diseased cells than by healthy cells.

In humans, *L. pneumophila* infection can lead ultimately to a severe pneumonia termed Legionnaires' disease (Fields, 1996).

The disease process can be initiated by human inhalation of contaminated water aerosols that contain *L. pneumophila* growing inside amoebae, enabling entry of the bacteria into the lungs where they invade alveolar macrophages (Fiore et al., 1998; Molmeret et al., 2005). When *L. pneumophila* infects host phagocytes, it avoids phagosome-lysosome fusion and subverts host cellular pathways to facilitate its own multiplication inside specialized Legionella-containing vesicles (LCVs) within the host cell (Horwitz and Silverstein, 1980; Horwitz, 1983a; Horwitz and Maxfield, 1984). The molecular mechanisms by which it achieves this are essential for pathogenesis and are similar in phagocytic human cells and protozoa, including the social amoeba *Dictyostelium discoideum* (Albert-Weissenberger et al., 2007; Hilbi et al., 2007). Because of this and its genetic tractability, Dictyostelium has become a favoured model in which to study the interactions between Legionella and its host (Hägele et al., 2000; Solomon et al., 2000; Skriwan et al., 2002; Fajardo et al., 2004; Farbrother et al., 2006; Peracino et al., 2006; Weber et al., 2006).

In one of the earliest such interactions in human monocytes and macrophages, host cell endoplasmic reticulum (ER) membranes and mitochondria are recruited to the vicinity of the phagosome (Horwitz, 1983b; Swanson and Isberg, 1995; Tilney et al., 2001). In the case of Dictyostelium, ER recruitment is well established (Fajardo et al., 2004; Lu and Clarke, 2005) but mitochondrial recruitment to the phagosome has not been reported; however, published electron micrographs of Legionella-containing cells from 30 minutes (Otto et al., 2004) and 3 hours after infection (Farbrother et al., 2006) suggest strongly that mitochondrial recruitment does occur. Here, we confirm, by laser scanning confocal and electron microscopy, that mitochondria are

<sup>1</sup>Department of Microbiology, La Trobe University, VIC 3086, Australia

<sup>2</sup>Centre for Cellular and Molecular Biology, Deakin University, Burwood, VIC 3125, Australia

<sup>3</sup>Department of Clinical and Biological Sciences, University of Turin, Ospedale S. Luigi, 10043 Orbassano, Italy

\*Author for correspondence (e-mail: p.fisher@latrobe.edu.au)

recruited to LCVs within the first 30 minutes of Legionella infection in Dictyostelium.

Recruitment of mitochondria to the phagosome is not the only interaction between Legionella and the mitochondria of its host. A recent microarray study revealed that Dictyostelium genes encoding mitochondrial proteins, including components of the respiratory electron transport chain, are upregulated within 3 hours of infection (Farbrother et al., 2006). The upregulation of mitochondrial biogenesis and the phagosomal recruitment of mitochondria suggest that mitochondria may provide nutritional or other support for the pathogen and that, to this end, Legionella subverts the host pathways regulating mitochondrial biogenesis and subcellular localization.

One of the key regulators of mitochondrial biogenesis and energy production in mammalian cells, and in Dictyostelium, is the energy-sensing protein kinase AMPK (AMP-activated protein kinase) (Hardie and Sakamoto, 2006; Bokko et al., 2007). AMPK is activated by AMP and inhibited by ATP so that it functions as a highly sensitive sensor of cellular energy status. In its activated form, AMPK phosphorylates target proteins and switches metabolism from anabolic to catabolic pathways. This is achieved by stimulating such processes as the uptake of glucose, fatty acid oxidation and mitochondrial biogenesis, and by inhibiting ATP-consuming processes, such as progression through the cell cycle and associated protein synthesis. In this way, AMPK maintains cellular energy homeostasis during periods of energy stress (Zhou et al., 2001; Hawley et al., 2003; Kahn et al., 2005; Hardie and Sakamoto, 2006; Kukidome et al., 2006).

Chronic cellular energy stress is characteristic of mitochondrial diseases, an eclectic group of poorly understood genetic disorders that impair the ATP-generating capacity of the mitochondria. In mitochondrial disease, AMPK is expected to be activated chronically because the ATP-generating capacity of the mitochondria is compromised permanently. We reported recently that, in the Dictyostelium model for mitochondrial disease, this chronic AMPK signalling causes diverse cytopathological outcomes (Bokko et al., 2007). Since mitochondrial biogenesis is stimulated by AMPK, and since Legionella infection upregulates both mitochondrial biogenesis and AMPK, we hypothesized that the chronic activation of AMPK in mitochondrially diseased cells might enhance the ability of Legionella to multiply within them. If so, mitochondrially diseased cells should support Legionella growth better than healthy cells because of chronic AMPK signalling. Here, we report molecular genetic evidence that this is so.

## RESULTS

### Mitochondria are recruited to LCVs in Dictyostelium

It has been established that the *L. pneumophila* Corby strain can infect and proliferate in *D. discoideum* in a manner that is analogous to its growth in macrophages (Solomon et al., 2000; Hägele et al., 2000). Macrophage and monocyte mitochondria are recruited to the Legionella phagosome soon after infection (Horwitz, 1983b; Tilney et al., 2001), but similar recruitment of the mitochondria has not been reported in Dictyostelium. To determine whether Dictyostelium mitochondria are recruited to LCVs, we infected cells of a transformant of the parental Dictyostelium strain AX2 that expressed a mitochondrially targeted green fluorescent protein (GFP) (Ahmed et al., 2006). The GFP was targeted to the

mitochondria by fusion with the N-terminal 150 amino acids from the essential mitochondrial matrix protein, chaperonin 60. The Legionella strain was a transformant of the Corby strain expressing a rapidly maturing Discosoma red fluorescent protein (DsRed) variant (Mampel et al., 2006). Within 30 minutes of infection, GFP-labelled mitochondria were associated closely with the Legionella

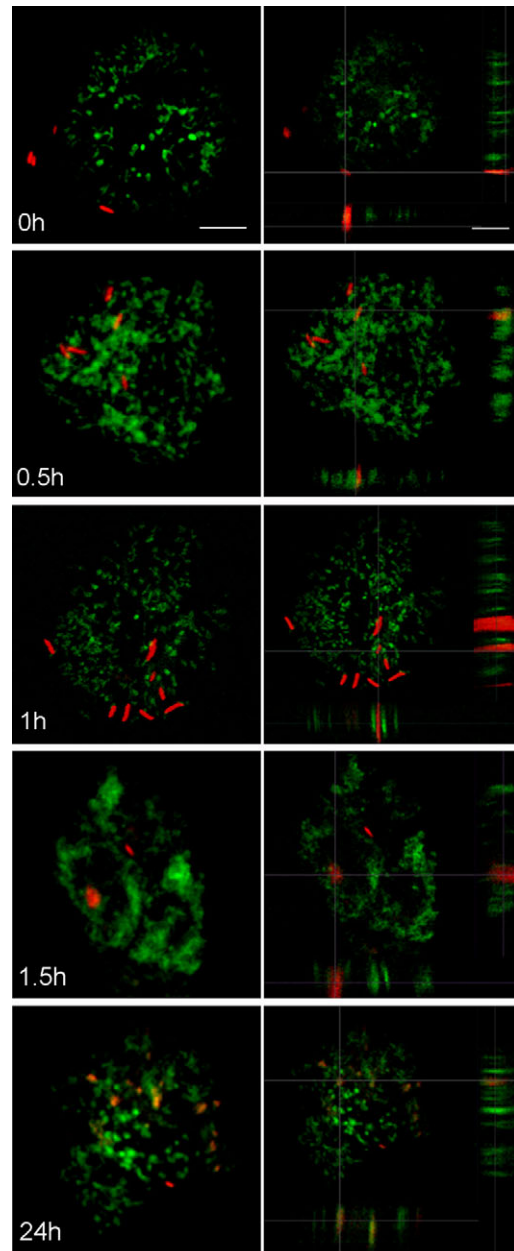

**Fig. 1. Confocal microscopy of an infection time series showing the wtGFP mitochondrial signal (green) within the transformed AX2 parental strain of Dictyostelium, and the association with the DsRed-Express Legionella signal (red).** Laser confocal micrographs were taken at 0 hours, 0.5 hours, 1.0 hours, 1.5 hours and 24 hours post-infection. For each time stage, the left hand image is a merger of a 20- to 30-image z-series. The right hand panel shows one xy image from this z-series, and the accompanying xz and yz slices at the marked cross hairs. This shows the spatial association of the mitochondria with bacteria in three different orientations. Bars, 5  $\mu$ m.

(Fig. 1; supplementary material Fig. S1; Movies 1-5). We were unable to find any LCVs that did not have at least one closely apposed mitochondrion. This association continued at the later stages of infection, but with fewer mitochondria, as is the case with macrophages (Table 1). By 24 hours post-infection, the DsRed fluorescence associated with the Legionella became diffuse, no longer revealed a defined outline to the bacterial cell, and appeared to colocalize with the mitochondrial GFP fluorescence. We do not know the basis for this change in appearance of the DsRed fluorescence marker.

At no stage of the infection was there a mass recruitment of mitochondria, but instead the Legionella appear to recruit a small number of mitochondria that become very closely associated, possibly attached as in macrophages, to the LCVs (Table 1). Of the LCVs that we examined inside infected cells by laser confocal microscopy, all had at least one closely associated mitochondrion, with most LCVs having two or three, and some having as many as five mitochondria in close association. Three-dimensional (3D) reconstructions revealed these associations to be extensive and intimate, in that they appeared to involve large areas of the mitochondrial and LCV surfaces being closely apposed to one another. This was confirmed by electron microscopy of thin sections of infected cells, as illustrated by Fig. 2, which shows an example from a cell at 1-hour post-infection. Two mitochondria are seen with parts of their outer membrane closely apposed to the membrane of the LCV. This close apposition of the membranes is reminiscent of that observed in the early stages of Legionella infection of human cells (Horwitz, 1983b).

#### Mitochondrially diseased Dictyostelium strains support greater *L. pneumophila* growth

The recruitment of mitochondria to the LCVs suggests that mitochondria may play a supportive role for Legionella in the early stages of infection. We therefore examined whether mitochondrially diseased cells exhibit altered susceptibility to Legionella. To do this, wild-type and mitochondrially diseased *D. discoideum* strains were plated as adherent monolayers in tissue culture wells and infected with *L. pneumophila*. Mitochondrial dysfunction in these strains was caused either by disruption of the mitochondrial large ribosomal RNA gene *rnl* in a subpopulation of the mitochondrial genomes (Wilczynska et al., 1997), or by antisense inhibition of expression of an essential nuclear-encoded mitochondrial protein, chaperonin 60 (Kotsifas et al., 2002).

Representative results from the Legionella-infection experiments involving mitochondrially diseased cells, along with appropriate

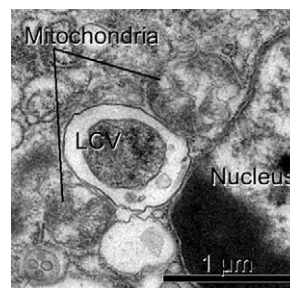

**Fig. 2. Transmission electron microscopy of a Dictyostelium cell infected with Legionella for 1 hour.** The image shows an LCV within which the cross section of a single bacterium is visible. Two mitochondria are closely associated with the LCV.

controls, appear in Fig. 3A. The *L. pneumophila* viable count increased approximately 50-fold in the presence of wild-type *D. discoideum* as host cells. The growth of *L. pneumophila* was dependent upon the presence of *D. discoideum*, since bacteria incubated without the *D. discoideum* host did not grow and instead lost viability over the 5-day period in the non-nutrient environment of the assay buffer (see inset in Fig. 3A). In the absence of *L. pneumophila*, *D. discoideum* remained viable throughout the experiment but did not grow under the assay conditions (data not shown).

In both classes of mitochondrially diseased strains, the *L. pneumophila* grew significantly faster and reached higher counts than in the parental *D. discoideum* strain. *L. pneumophila* multiplication was normal in control cells that had been transformed with either the empty Dictyostelium expression vector, pDNeo2 (HPF226, data not shown), or the chaperonin 60 sense RNA control (HPF418).

Similar experiments were conducted with a large number of independent mitochondrially diseased strains, including *rnl* disruptants (Wilczynska et al., 1997) and chaperonin 60 antisense transformants (Kotsifas et al., 2002). The results showed that the extent of Legionella replication in mitochondrially diseased strains ranged from being within the normal wild-type range to well above the wild-type range. This is illustrated in Fig. 3B, which shows histograms of the Legionella viable counts on day 5 of the infection for wild-type and mitochondrially diseased cells; these results were obtained from a large number of independent experiments using many different, independently isolated mutant strains.

The severity of the mitochondrial disease in these strains varies markedly with the severity of the underlying genetic defect (Wilczynska et al., 1997; Kotsifas et al., 2002). Thus, although it is difficult to quantitate, the *rnl* gene appears to be disrupted in a different proportion of the mitochondrial genomes in each mutant (Wilczynska et al., 1997). In the case of the chaperonin 60 antisense-inhibited strains, there are large differences in the number of copies of the antisense RNA-expression construct that are integrated into the genome; the more copies there are, the greater the inhibition of chaperonin 60 expression (Kotsifas et al., 2002). We therefore determined whether the differences in the extent of Legionella growth in the antisense-inhibited strains could be explained by differences in the copy number and, thus, in the severity of the mitochondrial defect. We found that, as with the other

**Table 1. Numbers of mitochondria associated with LCVs in infected Dictyostelium cells**

| Hours since infection                                       | 0.5       | 1         | 24        |
|-------------------------------------------------------------|-----------|-----------|-----------|
| Number of mitochondria associated with each LCV (mean±s.e.) | 3.31±0.41 | 1.75±0.20 | 2.47±0.33 |

Mitochondria were counted as being closely associated with the LCV if the bacterial and mitochondrial surfaces could not be resolved in the laser confocal microscope images (the limit of resolution was 0.46 μm). Note: In a mixture of Dictyostelium and Legionella cells that were fixed immediately after mixing, there were no infected cells and none of the bacteria that were located on, or near, the surface of the cells had any closely associated mitochondria.

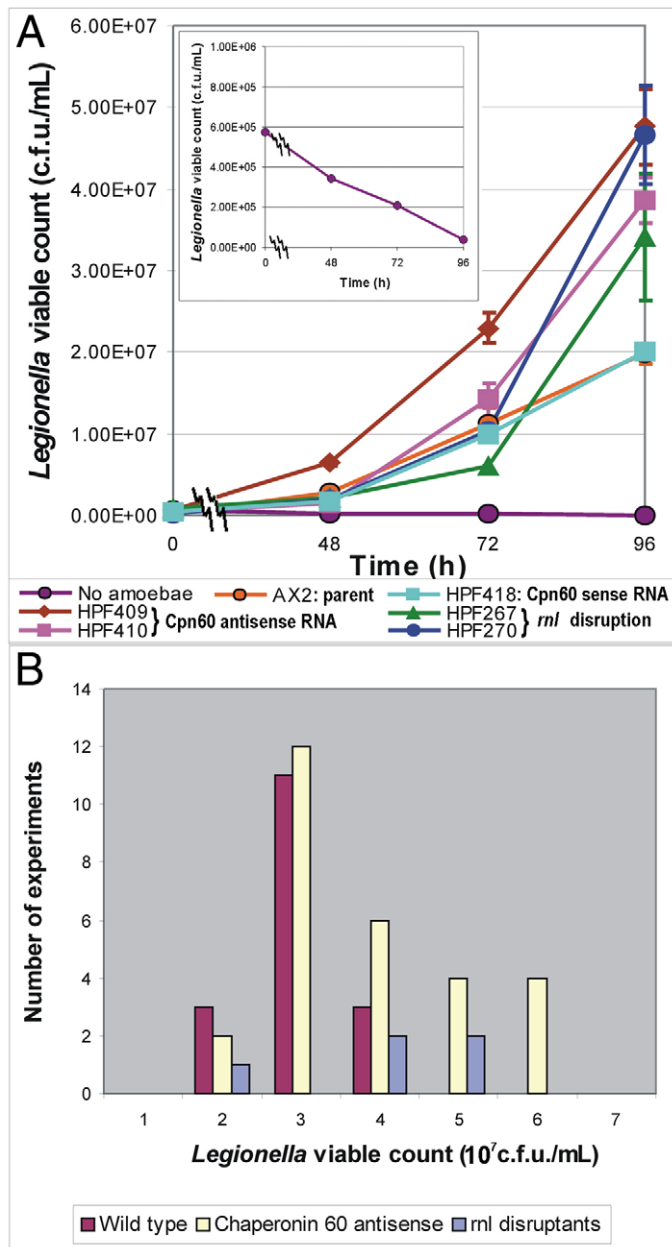

**Fig. 3. Mitochondrial disease enhances susceptibility to Legionella in Dictyostelium.** (A) The cells of all strains were infected with the *L. pneumophila* Corby strain over a 5-day period. The control strains were the wild type (AX2) and a chaperonin 60 (Cpn60) sense RNA-expressing transformant (HPF418). The strains with mitochondrial dysfunction either had insertions in a subset of the mitochondrial *ml* genes (HPF267, HPF270) or carried the Cpn60 antisense construct (HPF409, HPF410). Bacterial viable counts are plotted as a function of time. A negative control in which the Legionella were plated with no host amoebae (No amoebae) was also included (also see inset). Bacterial viable counts were performed in duplicate or triplicate. Error bars are standard errors reflecting viable count errors within the experiment. Some error bars are not visible as they are smaller than the symbols used. (B) Histogram of Legionella viable counts, taken 96 hours after infection, for the parental Dictyostelium strain (AX2) and mitochondrially diseased derivatives. The ordinate is the number of independent experiments in which the Legionella count at 5 days was as indicated by the abscissa. For the wild-type strain AX2, 17 independent infection experiments were conducted. Independent infection experiments were conducted for each of the three mitochondrial *ml* disruption strains (1 or 2 experiments per strain) and for each of the 18 chaperonin 60 antisense-inhibited transformants (1-3 experiments per transformant). The two-sample *t*-test, assuming unequal variances, indicated a *P* value of  $4.4 \times 10^{-5}$  for a one-tailed test of the null hypothesis (which stated that the infection level was not significantly higher in the mitochondrially diseased cells). The nonparametric Kruskal-Wallis test of the same hypothesis yielded  $P=6.5 \times 10^{-4}$ .

*coli*) (Bokko et al., 2007). We therefore anticipated that the initial uptake of Legionella by Dictyostelium cells would also be unaffected and so would not explain the enhanced proliferation that we observed. To verify whether this was true, we assayed the rate of Legionella uptake by wild-type strains and by representative strains in which mitochondrial dysfunction was elicited by chaperonin 60 antisense inhibition. We found that the rate of Legionella uptake was unaltered in the mitochondrially diseased strains during the first 2 hours of infection (Fig. 5).

### The increased susceptibility of mitochondrially diseased Dictyostelium strains is caused by chronic AMPK signalling

The mitochondrial disease phenotypes reported previously for Dictyostelium, including impaired phototaxis, thymotaxis, growth and multicellular development, are the result of the activity of an energy-sensing cellular alarm protein, AMPK (Bokko et al., 2007). This was shown genetically by overexpressing a truncated active form of the catalytic AMPK $\alpha$  subunit (AMPK $\alpha$ T) and by antisense-inhibiting native AMPK $\alpha$  expression in mitochondrially diseased cells. The diverse phenotypic outcomes of mitochondrial dysfunction were all phenocopied by AMPK $\alpha$ T overexpression in otherwise healthy cells, whereas antisense inhibition of AMPK expression in mitochondrially diseased cells suppressed all aberrant phenotypes. Phagocytosis and pinocytosis rates were unaffected by the levels of active AMPK.

To determine whether AMPK activation was similarly responsible for the increased susceptibility of mitochondrially diseased cells to Legionella, we infected AMPK $\alpha$ T-overexpressing cells, AMPK $\alpha$  antisense-inhibited cells, and mitochondrially diseased cells (chaperonin 60 antisense inhibition) in which AMPK expression was antisense inhibited. Fig. 6A shows representative growth curves for Legionella infections in strains belonging to these different categories. AMPK $\alpha$ T hyperexpression (HPF437) caused a significant increase in the susceptibility of

mitochondrial disease phenotypes in Dictyostelium (Kotsifas et al., 2002; Bokko et al., 2007), a correlation exists between copy number and susceptibility to Legionella infection in the chaperonin 60 antisense-inhibited cells (Fig. 4). The  $R^2$  value indicates that this correlation explains about 40% of the variance in the Legionella counts on day 5 of the infection.

### The increased susceptibility of mitochondrially diseased strains to Legionella is not the result of increased rates of infection

The increased proliferation of Legionella in mitochondrially diseased Dictyostelium cells could have been the result of an increased susceptibility to initial infection. However, we reported recently that although mitochondrial dysfunction retards growth in Dictyostelium, it has no effect on the rate of nutrient uptake by pinocytosis or by phagocytosis of bacterial prey (such as *Escherichia*

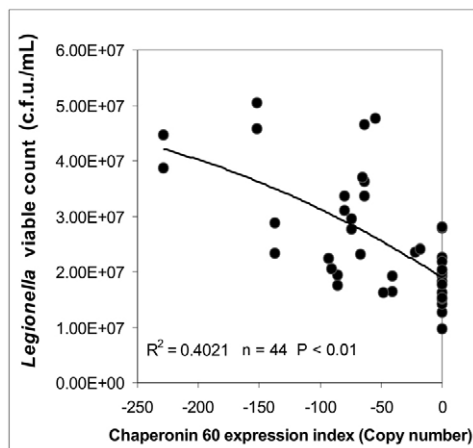

**Fig. 4. Effect of chaperonin 60 antisense construct levels on susceptibility to Legionella.** Legionella viable counts from day 5 are plotted. Each circle represents an independent infection assay of a specific Dictyostelium strain containing the indicated number of copies of the chaperonin 60 antisense construct. The previously adopted convention of assigning negative values to copy numbers for antisense constructs was followed (Bokko et al., 2007). Copy numbers of zero represent the wild-type strain (AX2).

Dictyostelium to Legionella and thus phenocopied the effects of mitochondrial disease (HPF602). Conversely, when expression of the native AMPK $\alpha$  was antisense inhibited in otherwise healthy cells (HPF461), there was a slight reduction, or no significant difference, in Legionella proliferation in comparison to infections of wild-type host cells (AX2). Legionella growth was enhanced in host cells with a mitochondrial dysfunction resulting from chaperonin 60 antisense inhibition (HPF602), but this phenotype was suppressed by concurrent antisense inhibition of AMPK $\alpha$  expression (HPF505). These results suggest that AMPK signalling is responsible for the enhanced ability of mitochondrially diseased host cells to support Legionella proliferation.

To verify that increased levels of active AMPK cause increased proliferation of *L. pneumophila* in host cells, we examined the correlation between Legionella proliferation and the copy numbers of the antisense-inhibition and overexpression constructs. Fig. 6B shows that Legionella growth was enhanced in a copy-number-dependent manner by overexpression of active AMPK $\alpha$ T and slightly inhibited or unaffected by AMPK $\alpha$  antisense inhibition. Whereas mitochondrial dysfunction caused increased Legionella proliferation in otherwise healthy cells, the susceptibility to Legionella was restored to normal in all mitochondrially diseased strains in which AMPK $\alpha$  expression was antisense inhibited (red squares). This genetic suppression is analogous to that observed in these strains in relation to the other mitochondrial disease phenotypes (Bokko et al., 2007). We conclude that the increased susceptibility to *L. pneumophila* that are associated with mitochondrial disease in *D. discoideum* is mediated by AMPK signalling.

## DISCUSSION

During the process of *L. pneumophila* infection in macrophages and monocytes, phagosomes containing Legionella interact with

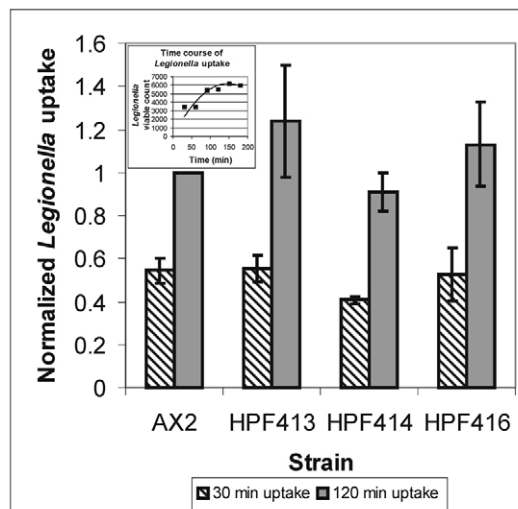

**Fig. 5. Effect of mitochondrial dysfunction on the rate of Legionella uptake.** The uptake of Legionella during a 2-hour period of infection was measured for the parental strain (AX2) and for representative mitochondrially diseased strains (in which mitochondrial dysfunction was elicited by antisense-inhibited chaperonin 60 expression). The copy numbers for the chaperonin 60 antisense construct were 162 (HPF413), 112 (HPF414) and 93 (HPF416). The Legionella uptake was based on viable counts of internalized bacteria, normalized against the count for AX2 after 2 hours of infection in the same experiment. Error bars are standard errors of the mean from three independent experiments. The inset shows a representative time course of infection of AX2.

mitochondria for approximately 1 hour and then associate with ribosomes after about 4 hours (Horwitz, 1983b; Tilney et al., 2001). Our results confirm that this early association between mitochondria and *L. pneumophila* exists also in Dictyostelium. Within 30 minutes of infection, every single LCV had between one and five closely associated mitochondria. Our experiments do not show whether this association requires active pathogen functions. In future experiments, it would be of interest to use killed Legionella and nonpathogenic mutants to determine whether specific pathogen genes are required for association of the mitochondria with the LCV.

The association between the mitochondria and the Legionella continued throughout the first few hours of the infection in the form of a close apposition between each LCV and a small number of mitochondria. However, by 24 hours of infection, the mitochondrial GFP and the Legionella DsRed signal appeared to be colocalized and the DsRed signal no longer showed the sharp, discrete outline of the bacteria. We do not know the basis for this apparent colocalization, which has not been reported previously in any Legionella host; however, there are several possibilities that could be the subject of future investigation. One is a fusion between the mitochondria and the LCV, releasing the contents of the mitochondrial matrix into the lumen of the LCV. However, this would not explain the loss of the bacterial DsRed outline. A second possibility is that at least some LCVs with attached mitochondria have fused with lysosomes where they are undergoing degradation. Although this would be consistent with the altered appearance of the DsRed fluorescence, it cannot be the case that every LCV

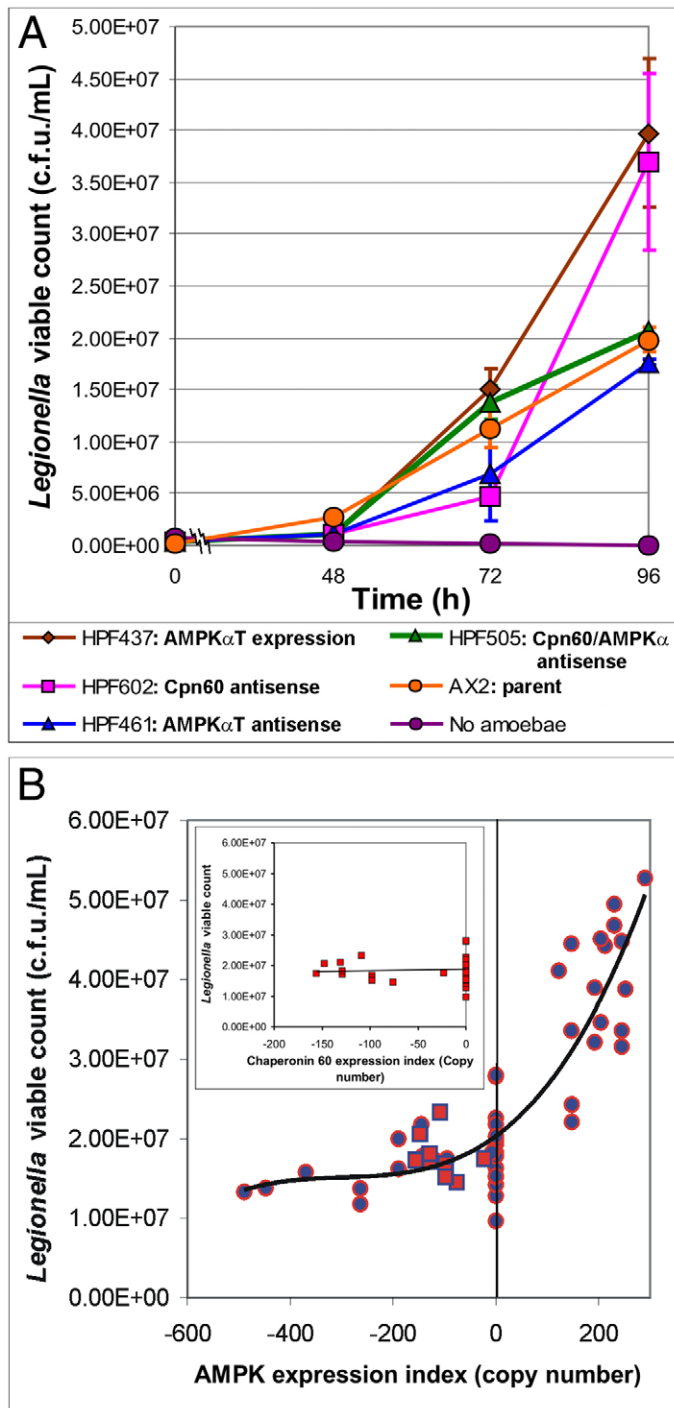

**Fig. 6. Effect of AMPK $\alpha$  and chaperonin 60 expression levels on Legionella proliferation.** (A) Representative *L. pneumophila* infection experiments are shown for AMPK $\alpha$ T overexpression (HPF437), AMPK $\alpha$  antisense inhibition (HPF461), chaperonin 60 antisense inhibition (HPF602), and AMPK $\alpha$  antisense inhibition in mitochondrially diseased (chaperonin 60 antisense inhibition) cells (HPF505). Controls included the parental host strain (AX2), and Legionella plated with no host amoebae (*L. pneumophila*). Viable counts were performed in duplicate or triplicate. Error bars are standard errors reflecting viable count errors within the experiment. Some error bars are not visible as they are smaller than the symbols used. (B) Legionella viable counts on the fifth day of infection. Each circle represents a specific strain that carries the indicated number of copies of either the AMPK $\alpha$ T overexpression construct (positive values) or the AMPK $\alpha$  antisense construct (negative values). Each square represents a specific strain that has the indicated number of copies of both the chaperonin 60 antisense construct (inset) and the AMPK $\alpha$  antisense construct (main panel). In each case, copy numbers of zero refer to the wild-type strain (AX2). Chaperonin 60 antisense inhibition had no significant effect on Legionella proliferation when AMPK $\alpha$  expression was also antisense inhibited.

proteins, through the bacterial Dot/Icm protein secretion system. This would explain the change in appearance of the DsRed fluorescence.

Our findings have also demonstrated that mitochondrially diseased *D. discoideum* cells can support the growth of *L. pneumophila* better than the wild-type host strain AX2. This was observed both for strains in which chaperonin 60 expression was antisense inhibited (Kotsifas et al., 2002) and strains in which the mitochondrial *rnl* gene had been disrupted in a subpopulation of the mitochondrial genomes (Wilczynska et al., 1997). In the former case, the intracellular proliferation of Legionella increased with the copy number of the chaperonin 60 antisense-inhibition construct, that is, as the severity of the resulting mitochondrial dysfunction increased.

We reported recently that chronic AMPK signalling is responsible for diverse cytopathologies in mitochondrially diseased Dictyostelium cells, where it impairs cell proliferation, multicellular morphogenesis and photosensory signal transduction (Bokko et al., 2007). The results presented here demonstrate that AMPK signalling in response to mitochondrial dysfunction likewise causes increased susceptibility to Legionella. The intracellular growth of Legionella increased with the copy number of the AMPK $\alpha$ T overexpression construct in otherwise healthy cells. AMPK $\alpha$ T is a truncated form of the catalytic  $\alpha$  subunit that contains the entire catalytic domain, but whose C-terminal regulatory region is interrupted by a premature stop codon (Bokko et al., 2007). Similar constructs of mammalian AMPK $\alpha$  isoforms are constitutively phosphorylated by upstream kinases and are thus permanently active (Hawley et al., 2003; Hong et al., 2003; Shaw et al., 2004). The AMPK $\alpha$ T form of the Dictyostelium kinase used in these experiments is similarly phosphorylated (Annesley and Garrecht, unpublished data). Whereas AMPK $\alpha$ T hyperexpression resulted in increased Legionella proliferation, AMPK $\alpha$  antisense inhibition suppressed the phenotype in mitochondrially diseased cells. Together, these findings show that the ability of the host cell to support intracellular replication of Legionella can be regulated by AMPK signalling in response to the energy stress associated with mitochondrial disease. Although AMPK activity in the host cell stimulates Legionella growth, it is not essential since AMPK $\alpha$

undergoes such a fate since the Legionella would not then proliferate subsequently as they do. Furthermore, DsRed fluorescence is pH insensitive from pH 4.5 to 12 (Baird et al., 2000), whereas the GFP fluorescence should fade dramatically in the acidic environment of the lysosome (Kneen et al., 1998). An obvious loss of the GFP signal relative to the DsRed signal after 24 hours of infection was not apparent in our experiments. A third possibility is that the DsRed has been exported from the Legionella into the mitochondria, perhaps along with some of the other pathogen

antisense inhibition made only a small difference to Legionella proliferation in otherwise healthy cells.

In mammalian cells, AMPK is not only activated by various stressors, but the expression of AMPK subunits is also upregulated by such stresses, including hypoxia, osmotic stress and hyperbaric stress (Tian et al., 2001; Fraser et al., 2005; Laderoute et al., 2006). AMPK activity has been shown to cause mitochondrial proliferation both in mammalian cells (Bergeron et al., 2001; Zong et al., 2002) and in Dictyostelium (Bokko et al., 2007). Intriguingly, a recent report has shown that Dictyostelium genes encoding both AMPK and mitochondrial proteins, including components of the respiratory electron transport chain, are upregulated during the first few hours of Legionella infection (Farbrother et al., 2006). Although this increased expression need not be reflected in a proportionate increase in AMPK activity, it nonetheless suggests that there is a homeostatic host response directed at maintaining normal intracellular ATP levels. Our results indicate that proliferation of the pathogen would be enhanced as a consequence.

Legionella proliferation in macrophages and in *D. discoideum* relies on the pathogen avoiding the endolysosomal pathway, which it does by inhibiting fusion of the phagosome with lysosomes (Roy et al., 1998; Wiater et al., 1994; Solomon et al., 2000). However, an integrated view of the signalling pathways and interactions between Legionella proteins and host proteins during Legionella pathogenesis is yet to be established. Numerous interactions may occur between mitochondria, AMPK and *L. pneumophila* virulence factors during pathogenesis. For example, it was reported recently that one of the secreted virulence factors produced by *L. pneumophila*, Lpg1905, is a novel ecto-nucleoside triphosphate diphosphohydrolase (ecto-NTPDase or apyrase) (Sansom et al., 2007). Lpg1905 exhibited ATPase and ADPase activity and contributed to the ability of *L. pneumophila* to infect and replicate in macrophages, epithelial cells and amoebae. Lpg1905 may act as a virulence factor by regulating extracellular or intracellular levels of ATP, depending on whether secretion occurs before or after Legionella uptake by the host cell (Sansom et al., 2007; Sansom et al., 2008). An intracellular site of action seems probable if apyrase secretion accompanies that of other virulence factors that are known to be secreted within the host cell after pathogen uptake. Since AMPK is activated by AMP and inhibited by ATP, secretion of apyrase into the host cell by invading Legionella could result in AMPK activation. Our results show that this would in turn facilitate Legionella proliferation within the host cell. It is possible that AMPK also facilitates intracellular replication of other microbial pathogens, such as *Mycobacterium* spp., which also secrete ecto-ATPases (Zaborina et al., 1999).

Although AMPK activation provides a possible mechanism by which the Legionella apyrase Lpg1905 contributes to virulence, this ecto-NTPDase could also work by preventing purinergic P2X receptor activation within the host tissue (Sansom et al., 2008). Extracellular ATP promotes fusion of the phagosome and lysosome, and has been shown to stimulate killing of intracellular *Mycobacterium* spp. in infected human macrophages (Fairbairn et al., 2001; Kusner and Barton, 2001). This action of ATP requires the purinergic P2X<sub>7</sub> receptor, an ATP-activated Ca<sup>2+</sup> channel, but the mechanisms involved are still unclear (Ferrari et al., 2006; Coutinho-Silva et al., 2007). The Dictyostelium genome has recently been reported to encode five different P2X receptors (Fountain

et al., 2007), at least one of which could be a plasma membrane Ca<sup>2+</sup> channel that is responsible for purinergic Ca<sup>2+</sup> responses (Ludlow et al., 2008). Another P2X receptor (P2XA) is localized within the contractile vacuolar membrane in Dictyostelium, but can conduct Ca<sup>2+</sup> ions across the plasma membrane of mammalian cells (Fountain et al., 2007). Phagolysosome fusion requires a transient local elevation of cytosolic Ca<sup>2+</sup> (Vieira et al., 2002; Worth et al., 2003; Stockinger et al., 2006) and so could be inhibited by intracellular or extracellular ATP depletion, preventing ATP-mediated activation of P2X receptors in the vacuolar, lysosomal or plasma membrane. It will be important in future work to determine whether AMPK activation or P2X receptor inactivity is the means by which Legionella apyrase contributes to virulence.

Whether or not AMPK is the downstream target of Legionella ecto-NTPDase, our results show that mitochondrially diseased cells are more permissive for replication of the pathogen because of chronic AMPK signalling. Consistent with this, various lines of evidence suggest that mitochondrial disease in humans results in increased susceptibility to infection. Neurodegeneration in mitochondrial disease is correlated clinically with an increased incidence of upper respiratory tract infections and other common infections (Naviaux, 1999). Other reports have indicated that children and adults with mitochondrial disorders have a high risk of recurrent infection (Edmonds et al., 2002; Edmonds, 2004; Wortmann et al., 2006). Furthermore, recurrent infection has been reported in individuals with specific mitochondrial diseases such as Kearns-Sayre syndrome (Katsanos et al., 2002) and Pearson syndrome (Lacbawan et al., 2000).

Genetic defects leading to mitochondrial dysfunction are thus among the many associations that have been reported over the years between human genes and vulnerability/susceptibility to specific infectious diseases (reviewed by Casanova and Abel, 2007). Our results show that host cell susceptibility to Legionella is elevated in an AMPK-dependent manner by energy stress arising from genetic mitochondrial dysfunction. Since AMPK is activated by a variety of other stressors, including oxidative stress, ischemia and osmotic stress (Hardie and Hawley, 2001; Hardie, 2004; Kahn et al., 2005; Hardie and Sakamoto, 2006), it is possible that cellular stress in a range of different circumstances may elevate pathogen replication not only in Legionnaires' disease, but also in other microbial diseases.

## METHODS

### Dictyostelium strains and culture conditions

All experiments were conducted with *D. discoideum* parental strain AX2 and transformants created from this strain (Wilczynska et al., 1997; Kotsifas et al., 2002; Bokko et al., 2007). The various strains belonged to five categories: (1) mutants in which the mitochondrial *rnl* gene was disrupted in a subset of the mitochondria: HPF266-270 (Wilczynska et al., 1997); (2) transformants expressing a chaperonin 60 (*hspA*) antisense RNA: HPF405-416, HPF601-612, or its corresponding sense RNA control: HPF417-418 (Kotsifas et al., 2002; Bokko et al., 2007); (3) transformants expressing an AMPK $\alpha$  (*snfA*) antisense RNA: HPF455-465, or its corresponding sense RNA control: HPF466-468 (Bokko et al., 2007); (4) transformants hyperexpressing a truncated active form of the catalytic  $\alpha$  subunit of AMPK (AMPK $\alpha$ T): HPF432-445 (Bokko et al., 2007); and (5) the *hspA* and

*snfA* antisense and sense constructs in each of the four possible combinations: HPF501-512, *hspA/snfA* double antisense; HPF551-553, *hspA/snfA* double sense; HPF581-586, *hspA* antisense/*snfA* sense; and HPF576-580, *hspA* sense/*snfA* antisense (Bokko et al., 2007). The copy numbers of the sense, antisense and overexpression constructs were determined previously by quantitative Southern blotting (Bokko et al., 2007). The presence of the *snfA* sense construct or the *hspA* sense construct had no effect on the phenotypes examined in this or in previous work (Bokko et al., 2007). For confocal microscopy, we used an AX2 transformant (HPF614) expressing GFP that was targeted to the mitochondria by N-terminal fusion with the first 150 amino acids of chaperonin 60 (Ahmed et al., 2006).

Cells grown axenically were cultured in HL5 liquid medium supplemented with 100 µg/ml ampicillin, 20 µg/ml streptomycin and 10 µg/ml tetracycline. Strains were also grown on bacterial lawns prepared from *Klebsiella aerogenes* on standard medium (SM) agar. As a selective marker, 20 µg/ml of G-418 was added to the growth media for all transformants during subculturing. However, for phenotypic studies, antibiotics were excluded from the media to prevent any possible associated effects.

#### Legionella strains and culture

The *L. pneumophila* strains used were derivatives of the pathogenic Corby strain (Mampel et al., 2006). Legionella were grown on ACES [N-(2-acetamido)-2-aminoethanesulfonic acid]-buffered charcoal yeast extract agar (BCYE) supplemented with 5 µg/ml chloramphenicol at 37°C with 5% CO<sub>2</sub> for 3 days (Wintermeyer et al., 1995). For storage, the bacteria were frozen in sterile distilled water in 200 µl aliquots and placed at -70°C. For confocal microscopy and Legionella uptake assays, we used the Corby strain transformed with a plasmid expressing a variant of DsRed, DsRed-Express, which lacks the minor green fluorescence of wild-type DsRed (Mampel et al., 2006).

#### Infection assay

The intracellular growth of the *L. pneumophila* in the mitochondrially diseased Dictyostelium strains was quantitated using a growth assay modified from Hägele et al. (Hägele et al., 2000) and Otto et al. (Otto et al., 2004). Dictyostelium amoebae were grown to a density of 1-2×10<sup>6</sup> cells/ml in axenic medium in shaken flasks. Cells were harvested by performing a 3-minute spin at 600 × g and washed twice in Sorensen 1×C buffer (17 mM KH<sub>2</sub>PO<sub>4</sub>/Na<sub>2</sub>PO<sub>4</sub>, 50 µM CaCl<sub>2</sub>, pH 6.0) before finally being resuspended in modified broth (MB) medium (0.7% yeast extract, 1.4% proteose peptone, 0.062% Na<sub>2</sub>HPO<sub>4</sub>·2H<sub>2</sub>O, 0.049% KH<sub>2</sub>PO<sub>4</sub>, pH 6.9) at a density of 5×10<sup>5</sup> cells/ml. For each strain, 10<sup>5</sup> cells were inoculated into each of five wells of a 96-well tissue culture plate. The cells in these wells were used for assaying Legionella viable counts at five time points: 0 hours, 24 hours, 48 hours, 72 hours and 96 hours. Cells were allowed to adhere for 30 minutes at 21°C before being infected with Legionella.

*L. pneumophila* were harvested after growth for 72 hours on BCYE plates, resuspended in water and used to infect *D. discoideum* at a multiplicity of infection (MOI) of approximately 1:1. The required concentration of bacteria was determined by assuming that an OD<sub>600</sub> of 1 is equivalent to 10<sup>9</sup> bacteria/ml. To initiate infection at the first time point, adherence between Dictyostelium

and Legionella was achieved by centrifuging the bacterial suspension onto the attached amoebae for 10 minutes at 600 × g.

At each assay time point, the cells were resuspended, then transferred into a microcentrifuge tube, pelleted for 8 minutes at 16,000 × g in a microcentrifuge, and vortexed vigorously for 15 seconds. A dilution series of the harvested bacteria was then prepared from 10<sup>-1</sup> to 10<sup>-4</sup> to measure the colony-forming units (c.f.u.) on BCYE plates incubated at 37°C with 5% CO<sub>2</sub> for 72-96 hours. For the time points ranging from 24 to 96 hours, the infected amoebae were incubated at 25.5°C.

#### Statistical techniques

To compare Legionella proliferation in the wild-type strain with the mitochondrially diseased strain, the two sample *t*-test assuming unequal variances and the Kruskal-Wallis nonparametric test for differences in location were employed. Standard regression and correlation analyses were carried out for data relating Legionella proliferation to the number of copies of plasmid constructs per cellular genome. The coefficient of variation (R<sup>2</sup>) was determined for fits to linear, exponential, logarithmic, power or polynomial models, as appropriate. R<sup>2</sup> is equivalent to the square of the Pearson product-moment *r*, which was used to determine the significance probability for correlations. The significance of all correlations was also tested using the nonparametric Kendall rank *r* and, in all cases, gave the same outcome at a significance level of *P*<0.01.

#### Confocal microscopy

Dictyostelium cultures were grown in culture flasks to a density of 1-2×10<sup>6</sup> cells/ml in HL5. Cells were washed twice in Sorensen buffer and resuspended to a final density of 5×10<sup>5</sup> cells/ml in 12 mM phosphate buffer (pH 6.5) or, for the 24-hour time points, LoFlo medium. 10<sup>6</sup> cells were added to each sterile coverslip in a Costar well and allowed to attach for 0.5 hours. *L. pneumophila* DsRed was harvested and resuspended, as for the infection assay, and added at an MOI of either 1:1 or 10:1 to the coverslips. Costar plates were centrifuged at 1370 × g for 10 minutes to allow Legionella attachment to cells. Coverslips were then removed at 0-, 0.5-, 1-, 1.5- and 24-hour intervals and washed twice in phosphate buffer (12 mM Na<sub>2</sub>HPO<sub>4</sub>, 12 mM NaH<sub>2</sub>PO<sub>4</sub>, pH 6.5). Cells were flattened and fixed under a layer of 1% agarose in phosphate buffer containing 3.7% paraformaldehyde for 30 minutes. After fixation, the coverslips were washed three times using PBS, blotted dry, mounted on glass slides using 10 µl of 90% glycerol in PBS solution, and sealed.

Confocal microscopy was performed with a Leica TCS SP2 confocal scanning laser microscope with a DM IRE2 inverted microscope using a 63× multi-immersion objective lens. Samples were excited with laser settings of 76% of 488 nm and 89% of 543 nm, and emissions were captured at 500-556 nm and 580-680 nm for wtGFP and DsRed-Express detection, respectively. A z-series of up to 30 focal plane images were captured for each cell, with 8 to 16 line averaging. Image stacks were compressed, filtered, spliced and 3D-animated using the Leica confocal software.

#### Electron microscopy

Infected cells were fixed with 2.5% glutaraldehyde in phosphate buffer; infiltrated with acetone and ethanol; and embedded in Spurr's epoxy resin. Sections, 80 nm thick, were stained with uranyl



## TRANSLATIONAL IMPACT

### Clinical issue

Mitochondrial diseases are an eclectic family of genetic disorders that compromise mitochondrial energy production. In many cases, the precise genetic defect causing mitochondrial dysfunction is known, but the downstream pathological outcomes for the mitochondrially diseased cell remain poorly understood. Patients experience a variety of symptoms affecting the central nervous system, muscles, heart and other tissues, and are also more susceptible to infections, particularly of the respiratory tract. The basis for this susceptibility has not been studied and is not understood.

### Results

To understand the influence of mitochondrial disease on susceptibility to microbial pathogens, this study examines Legionella infections in Dictyostelium amoebae. The authors show that, early during infection, Legionella-containing vacuoles associate with host cell mitochondria in Dictyostelium, as in human macrophages. For the first time, they show that this early association is followed by colocalization of proteins from the Legionella and the host cell mitochondria, suggesting that proteins are actively exported from Legionella into the host mitochondria. Cells with affected mitochondria show enhanced intracellular proliferation of Legionella, which is independent of pathogen uptake. This study also shows that the enhanced proliferation of Legionella inside mitochondrially diseased cells is dependent on chronic AMP-activated protein kinase (AMPK) signalling. AMPK is activated when cellular energy consumption outstrips production. The activated kinase inhibits many cellular energy-consuming activities and stimulates mitochondrial biogenesis and ATP production. The enzyme homeostatically regulates cellular energy status in a healthy cell, but in a mitochondrially diseased cell, chronic hyperactivity contributes to pathology. These results are consistent with previous data showing that mitochondrial dysfunction in Dictyostelium induces cytopathology by chronically activating AMPK. Importantly, Legionella multiplication is stimulated by hyperexpression of an active form of AMPK, which mimics the effects of mitochondrial dysfunction on this process. Conversely, genetic inhibition of AMPK expression suppresses the Legionella growth characteristic in mitochondrially diseased host cells.

### Implications and future directions

This is the first report that Legionella-containing vacuoles recruit mitochondria in infected Dictyostelium cells. Future work should determine whether this association requires active pathogen functions, as it does in other hosts, and whether pathogen proteins are exported into the mitochondria. It is not known why human mitochondrial disease patients are more susceptible to microbial infections, but this study reveals that mitochondrially diseased Dictyostelium cells are more supportive of Legionella proliferation than healthy cells. This is at least partially because of chronic AMPK signalling. Future research should determine whether this is true also for human and mouse macrophages and whether, in the mouse, AMPK signaling induces susceptibility to respiratory disease from Legionella infections. Enhanced Legionella proliferation is just one of several diverse cytopathological outcomes of AMPK activity in Dictyostelium mitochondrial disease. Thus, AMPK signalling pathways may provide drug targets for the management of these currently untreatable genetic disorders.

doi:10.1242/dmm.003947

acetate and Reynold's lead citrate before viewing with a Philips CM120 BioTWIN TEM. Images were digitally captured and formatted with Photoshop software.

### Legionella uptake assay

Dictyostelium cultures growing in HL5 medium in conical flasks were harvested through centrifugation for 1 minute at  $250 \times g$ ,

washed twice in Sorensen phosphate buffer and resuspended in MB medium at  $5 \times 10^5$  cells/ml. Aliquots of 200  $\mu$ l were transferred to wells in a 96-well Costar plate and allowed to settle for 30 minutes.

*L. pneumophila* DsRed growing on BCYE agar containing chloramphenicol (5  $\mu$ g/ml) were harvested in distilled water and resuspended in MB medium at  $1 \times 10^6$  cells/ml (based on OD<sub>600</sub>). Aliquots of 100  $\mu$ l were added to each Costar well containing Dictyostelium cells (i.e. at an MOI of 1). Costar plates were then spun at  $1370 \times g$  for 10 minutes at 21°C after which Dictyostelium cells were allowed to consume the *L. pneumophila*. At each time point, gentamicin sulphate (50  $\mu$ g/ml) was added to the wells to kill extracellular *L. pneumophila*. The gentamicin killing was shown to be completely effective in separate control experiments without Dictyostelium. Following 30 minutes of gentamicin treatment, cells were resuspended, harvested at  $13,600 \times g$  for 7 minutes, washed twice in Sorensen phosphate buffer, and lysed in 0.02% saponin with vigorous vortexing to release the intracellular Legionella. Viable counts of the released Legionella were performed in duplicate using BCYE agar plates incubated at 37°C with 5% CO<sub>2</sub> for 3-4 days.

### ACKNOWLEDGEMENTS

This work was supported by funds from the Thyne Reid Memorial Trusts. L.F., P.K.S. and S.L.A. were recipients of Australian Postgraduate Research Awards. P.B.B. was a recipient of La Trobe University Postgraduate Research and Overseas Postgraduate Research scholarships. L.F. additionally received a writing-up award from the Institute for Advanced Studies (IAS), La Trobe University. We are grateful to Alessandra Balest (University of Turin) for demonstrating the *Legionella pneumophila* infection protocol. Thanks to Claire Allan for assistance with some of the microscopy work.

### COMPETING INTERESTS

The authors declare no competing financial interests.

### AUTHOR CONTRIBUTIONS

L.F. conducted most of the experiments and drafted the manuscript; P.K.S. conducted the Legionella uptake assays; S.L.A., P.E.T. and P.L.B. performed the confocal laser and electron microscopy; P.B.B. isolated the AMPK antisense and overexpression strains; S.B. supervised and provided materials for some of the Legionella infection assays, while hosting L.F. in his laboratory for part of the work. P.R.F. conceived and supervised the project, contributed to the data analysis and preparation of the figures, and drafted parts of the manuscript.

### SUPPLEMENTARY MATERIAL

Supplementary material for this article is available at <http://dmm.biologists.org/lookup/suppl/doi:10.1242/dmm.003319/-/DC1>

Received 30 March 2009; Accepted 12 May 2009.

### REFERENCES

- Ahmed, A. U., Beech, P. L., Lay, S. T., Gilson, P. R. and Fisher, P. R. (2006). Import-associated translational inhibition—novel *in vivo* evidence for cotranslational protein import into *Dictyostelium* mitochondria. *Eukaryot. Cell* **5**, 1314–1327.
- Albert-Weissenberger, C., Cazalet, C. and Buchrieser, C. (2007). *Legionella pneumophila* – a human pathogen that co-evolved with fresh water protozoa. *Cell. Mol. Life Sci.* **64**, 432–448.
- Baird, G. S., Zacharias, D. A. and Tsien, R. Y. (2000). Biochemistry, mutagenesis, and oligomerization of DsRed, a red fluorescent protein from coral. *Proc. Natl. Acad. Sci. USA* **97**, 11984–11989.
- Barth, C., Le P. and Fisher, P. R. (2007). Mitochondrial biology and disease in *Dictyostelium*. *Int. Rev. Cytol.* **263**, 207–252.
- Bergeron, R., Ren, J. M., Cadman, K. S., Moore, I. K., Perret, P., Pypaert, M., Young, L. H., Semenkovich, C. F. and Shulman, G. I. (2001). Chronic activation of AMP kinase results in NRF-1 activation and mitochondrial biogenesis. *Am. J. Physiol. Endocrinol. Metab.* **281**, E1340–E1346.
- Bokko, P. B., Francione, L., Bandala-Sanchez, E., Ahmed, A. U., Annesley, S. J., Huang, X., Khurana, T., Kimmel, A. R. and Fisher, P. R. (2007). Diverse pathologies in mitochondrial disease are caused by AMP-activated protein kinase signalling. *Mol. Biol. Cell* **18**, 1874–1886.

- Casanova, J. and Abel, L. (2007). Human genetics of infectious diseases: a unified theory. *EMBO J.* **26**, 915-922.
- Chida, J., Yamaguchi, H., Amagai, A. and Maeda, Y. (2004). The necessity of mitochondrial genome DNA for normal development of *Dictyostelium* cells. *J. Cell Sci.* **117**, 3141-3152.
- Coutinho-Silva, R., da Cruz, C. M., Persechini, P. M. and Ojcius, D. M. (2007). The role of P2 receptors in controlling infections by intracellular pathogens. *Purinergic Signal.* **3**, 83-90.
- Edmonds, J. L. (2004). Surgical and anesthetic management of patients with mitochondrial dysfunction. *Mitochondrion* **45**, 43-548.
- Edmonds, J. L., Kirse, D. J., Kearns, D., Deutsch, R., Spruijt, L. and Naviaux, R. K. (2002). The Otolaryngological manifestations of mitochondrial disease and the risk of neurodegeneration with infection. *Arch. Otolaryngol. Head Neck Surg.* **128**, 355-362.
- Fairbairn, I. P., Stober, C. B., Kumararatne, D. S. and Lammas, D. A. (2001). ATP-mediated killing of intracellular *Mycobacteria* by macrophages is a P2X(7)-dependent process inducing bacterial death by phagosome-lysosome fusion. *J. Immunol.* **167**, 3300-3307.
- Fajardo, M., Schleicher, M., Noegel, A., Bozzaro, S., Killinger, S., Heuner, K., Hacker, J. and Steinert, M. (2004). Calnexin, calreticulin and cytoskeleton-associated proteins modulate uptake and growth of *Legionella pneumophila* in *Dictyostelium discoideum*. *Microbiology* **150**, 2825-2835.
- Farbrother, P., Wagner, C., Na, J., Tunggal, B., Morio, T., Urushihara, H., Tanaka, Y., Schleicher, M., Steinert, M. and Eichinger, L. (2006). *Dictyostelium* transcriptional host cell response upon infection with *Legionella*. *Cell. Microbiol.* **8**, 438-456.
- Ferrari, D., Pizzirani, C., Adinolfi, E., Lemoli, R. M., Curti, A., Idzko, M., Panther, E. and Di Virgilio, F. (2006). The P2X7 receptor: a key player in IL-1 processing and release. *J. Immunol.* **176**, 3877-3883.
- Fields, B. S. (1996). The molecular ecology of legionellae. *Trends Microbiol.* **4**, 286-290.
- Fiore, A. E., Nuorti, J. P., Levine, O. S., Marx, A., Weltman, A. C., Yeager, S., Benson, R. F., Pruckler, J., Edelstein, P. H., Greer, P. et al. (1998). Epidemic Legionnaires' disease two decades later: old sources, new diagnostic methods. *Clin. Infect. Dis.* **26**, 426-433.
- Fountain, S. J., Parkinson, K., Young, M. T., Cao, L., Thompson, C. R. and North, R. A. (2007). An intracellular P2X receptor required for osmoregulation in *Dictyostelium discoideum*. *Nature* **448**, 200-203.
- Fraser, S., Mount, P., Hill, R., Levidiotis, V., Katsis, F., Stapleton, D., Kemp, B. E. and Power, D. A. (2005). Regulation of the energy sensor AMP-activated protein kinase in the kidney by dietary salt intake and osmolality. *Am. J. Physiol. Renal Physiol.* **288**, F578-F586.
- Geromel, V., Kadhon, N., Ceballos-Picot, I., Ouari, O., Polidori, A., Munnich, A., Rötig, A. and Rustin, P. (2001). Superoxide-induced massive apoptosis in cultured skin fibroblasts harbouring in the neurogenic ataxia retinitis pigmentosa (NARP) mutation in the ATPase-6 gene of the mitochondrial DNA. *Hum. Mol. Genet.* **10**, 1221-1228.
- Goto, Y., Horai, S., Matsuoka, T., Koga, Y., Nihei, K., Kobayashi, M. and Nonaka, I. (1992). Mitochondrial myopathy, encephalopathy, lactic acidosis, and stroke-like episodes (MELAS): a correlative study of the clinical features and mitochondrial DNA mutation. *Neurology* **42**, 545-550.
- Hägele, S., Köhler, R., Merkert, H., Schleicher, M., Hacker, J. and Steinert, M. (2000). *Dictyostelium discoideum*: a new host model system for intracellular pathogens of the genus *Legionella*. *Cell. Microbiol.* **2**, 165-171.
- Hardie, D. G. (2004). The AMP-activated protein kinase pathway-new players upstream and downstream. *J. Cell Sci.* **117**, 5479-5487.
- Hardie, D. G. and Hawley, S. A. (2001). AMP-activated protein kinase: the energy charge hypothesis revisited. *BioEssays* **23**, 1112-1119.
- Hardie, D. G. and Sakamoto, K. (2006). AMPK: A key sensor of fuel and energy status in skeletal muscle. *Physiology* **21**, 48-60.
- Hawley, S. A., Boudeau, J., Reid, J. L., Mustard, K. J., Udd, L., Mäkelä, T. P., Alessi, D. R. and Hardie, D. G. (2003). Complexes between the LKB1 tumor suppressor, STRAD  $\alpha/\beta$  and MOD are  $\alpha/\beta$  are upstream kinases in the AMP-activated protein kinase cascade. *J. Biol.* **2**, 28.
- Hilbi, H., Weber, S. S., Ragaz, C., Nyfeler, Y. and Urwyler, S. (2007). Environmental predators as models for bacterial pathogenesis. *Environ. Microbiol.* **9**, 563-575.
- Hong, S. P., Leiper, F. C., Woods, A., Carling, D. and Carlson, M. (2003). Activation of yeast Snf1 and mammalian AMP-activated protein kinase by upstream kinases. *Proc. Natl. Acad. Sci. USA* **100**, 8839-8843.
- Horwitz, M. A. (1983a). Legionnaires' disease bacterium (*Legionella pneumophila*) inhibits phagosome-lysosome fusion in human monocytes. *J. Exp. Med.* **158**, 2108-2126.
- Horwitz, M. A. (1983b). Formation of a novel phagosome by the Legionnaires' disease bacterium (*Legionella pneumophila*) in human monocytes. *J. Exp. Med.* **158**, 1319-1331.
- Horwitz, M. A. and Silverstein, S. C. (1980). Legionnaires' disease bacterium (*Legionella pneumophila*) multiplies intracellularly in human monocytes. *J. Clin. Invest.* **66**, 441-450.
- Horwitz, M. A. and Maxfield, F. R. (1984). *Legionella pneumophila* inhibits acidification of its phagosome in human monocytes. *J. Cell Biol.* **99**, 1936-1943.
- Kahn, B. B., Alquier, T., Carling, D. and Hardie, D. G. (2005). AMP-activated protein kinase: ancient energy gauge provides clues to modern understanding of metabolism. *Cell. Metab.* **1**, 15-25.
- Katsanos, K. H., Pappas, C. J., Patsouras, D., Michalis, L. K., Kitsios, G., Elisaf, M. and Tsianos, E. V. (2002). Alarming atrioventricular block and mitral valve prolapse in the Kearns-Sayre syndrome. *Int. J. Cardiol.* **83**, 179-181.
- Kneen, M., Farinas, J., Li, Y. and Verkman, A. S. (1998). Green Fluorescent Protein as a noninvasive intracellular pH indicator. *Biophys. J.* **74**, 1591-1599.
- Kotsifas, M., Barth, C., Lay, S. T., de Lozanne, A. and Fisher, P. R. (2002). Chaperonin 60 and mitochondrial disease in *Dictyostelium*. *J. Muscle Res. Cell Motil.* **23**, 839-852.
- Kukidome, D., Nishikawa, T., Sonada, K., Imoto, K., Fujisawa, K., Yano, M., Motoshima, H., Taguchi, T., Matsumura, T. and Araki, E. (2006). Activation of AMP-activated protein kinase reduces hyperglycemia-induced mitochondrial reactive oxygen species production and promotes mitochondrial biogenesis in human umbilical vein endothelial cells. *Diabetes* **55**, 120-127.
- Kusner, D. J. and Barton, J. A. (2001). ATP stimulates human macrophages to kill intracellular virulent *Mycobacterium tuberculosis* via calcium-dependent phagosome-lysosome fusion. *J. Immunol.* **167**, 3308-3315.
- Lacabanne, F., Tiffet, C. J., Luban, N. L. C., Schmandt, S. M., Guerrero, M., Weinstein, S., Pennybacker, M. and Wong, L. C. (2000). Clinical heterogeneity in mitochondrial DNA deletion disorders: a diagnostic challenge of Pearson syndrome. *Am. J. Med. Genet.* **95**, 266-268.
- Laderoute, K. R., Amin, K., Calaoagan, J. M., Knapp, M., Le T., Orduna, J., Foretz, M. and Violett, B. (2006). 5'-AMP-activated Protein Kinase (AMPK) is induced by low-oxygen and glucose deprivation conditions found in solid-tumor microenvironments. *Mol. Cell. Biol.* **26**, 5336-5347.
- Lu, H. and Clarke, M. (2005). Dynamic properties of *Legionella*-containing phagosomes in *Dictyostelium* amoebae. *Cell. Microbiol.* **7**, 995-1007.
- Ludlow, M. J., Traynor, D., Fisher, P. R. and Ennion, S. J. (2008). Purinergic-mediated  $Ca^{2+}$  influx in *Dictyostelium discoideum*. *Cell Calcium* **44**, 567-579.
- Mackey, D. A., Oostra, R. J., Rosenberg, T., Nikoskelainen, E., Bronte-Stewart, J., Poulton, J., Harding, A. E., Govan, G., Bolhuis, P. A., Norby, S. et al. (1996). Primary pathogenic mtDNA mutations in multigeneration pedigrees with Leber hereditary optic neuropathy. *Am. J. Hum. Genet.* **59**, 481-485.
- Mampel, J., Spirig, T., Weber, S. S., Haagensen, J. A. J., Molin, S. and Hilbi, H. (2006). Planktonic replication is essential for biofilm formation by *Legionella pneumophila* in a complex medium under static and dynamic flow conditions. *Appl. Environ. Microbiol.* **72**, 2885-2895.
- McKenzie, M., Liolista, D. and Hanna, M. G. (2004). Mitochondrial disease: mutations and mechanisms. *Neurochem. Res.* **29**, 589-600.
- Molmeret, M., Horn, M., Wagner, M., Santic, M. and Abu Kwaik, Y. (2005). Amoebae as training grounds for intracellular bacterial pathogens. *Appl. Environ. Microbiol.* **71**, 20-28.
- Naviaux, R. K. (1999). *Atlas of Metabolic Disease*. New York: Chapman & Hall.
- Ogawa, D., Shikata, K., Matsuda, M., Wada, J., Uchida, H., Asada, M. and Makino, H. (2003). Pelvic lymphocyst infection associated with maternally inherited diabetes mellitus. *Diabet. Res. Clin. Pract.* **61**, 137-141.
- Otto, G. P., Wu, M. Y., Clarke, M., Lu, H., Anderson, O. R., Hilbi, H., Shuman, H. A. and Kessin, R. H. (2004). Macroautophagy is dispensable for intracellular replication of *Legionella pneumophila* in *Dictyostelium discoideum*. *Mol. Microbiol.* **51**, 63-72.
- Peracino, B., Wagner, C., Balest, A., Balbo, A., Pergolizzi, B., Noegel, A., Steinert, M. and Bozzaro, S. (2006). Function and mechanism of action of *Dictyostelium* Nramp1 (Slc11a1) in bacterial infection. *Traffic* **7**, 22-38.
- Rosignol, R., Faustin, B., Rocher, C., Malgat, M., Mazat, J. and Letellier, T. (2003). Mitochondrial threshold effects. *Biochem. J.* **370**, 751-762.
- Roy, C. R., Berger, K. H. and Isberg, R. R. (1998). *Legionella pneumophila* DotA protein is required for early phagosome trafficking decisions that occur within minutes of bacterial uptake. *Mol. Microbiol.* **28**, 663-674.
- Sansom, F. M., Newton, H. J., Crikis, S., Cianciotto, N. P., Cowan, P. J., d'Apice, A. J. F. and Hartland, E. L. (2007). A bacterial ecto-triphosphate diphosphohydrolase similar to human CD39 is essential for intracellular multiplication of *Legionella pneumophila*. *Cell. Microbiol.* **9**, 1922-1935.
- Sansom, F. M., Riedmaier, P., Newton, H. J., Dunstone, M. A., Müller, C. E., Stephan, H., Byres, E., Beddoe, T., Rossjohn, J., Cowan, P. J. et al. (2008). Enzymatic properties of an ecto-nucleoside triphosphate diphosphohydrolase from *Legionella pneumophila*: substrate specificity and requirement for virulence. *J. Biol. Chem.* **283**, 12909-12918.
- Shaw, R. J., Kosmatka, M., Bardeesy, N., Hurley, R. L., Witters, L. A., DePinho, R. A. and Cantley, L. C. (2004). The tumor suppressor LKB1 kinase directly activates AMP-activated kinase and regulates apoptosis in response to energy stress. *Proc. Natl. Acad. Sci. USA* **101**, 3329-3335.

- Skriwan, C., Fajardo, M., Hägele, S., Horn, M., Wagner, M., Michel, R., Krohne, G., Schleicher, M., Hacker, J. and Steinert, M.** (2002). Various bacterial pathogens and symbionts infect the amoeba *Dictyostelium discoideum*. *Int. J. Med. Microbiol.* **291**, 615-624.
- Solomon, J. M., Rupper, A., Cardelli, J. A. and Isberg, R. R.** (2000). Intracellular growth of *Legionella pneumophila* in *Dictyostelium discoideum*, a system for genetic analysis of host-pathogen interactions. *Infect. Immun.* **68**, 2939-2947.
- Stockinger, W., Zhang, S. C., Trivedi, V., Jarzylo, L. A., Shieh, E. C., Lane, W. S., Castoreno, A. B. and Nohturfft, A.** (2006). Differential requirements for actin polymerization, calmodulin, and Ca<sup>2+</sup> define distinct stages of lysosome/phagosome targeting. *Mol. Biol. Cell* **17**, 1697-1710.
- Swanson, M. S. and Isberg, R. R.** (1995). Association of *Legionella pneumophila* with the macrophage endoplasmic reticulum. *Infect. Immun.* **63**, 3609-3620.
- Tatuch, Y. and Robinson, B. H.** (1993). The mitochondrial DNA mutation at 8993 associated with NARP slows the rate of ATP synthesis in isolated lymphoblast mitochondria. *Biochem. Biophys. Res. Comm.* **192**, 124-128.
- Tian, R., Musi, N., D'Agostino, J., Hirshman, M. F. and Goodyear, L. J.** (2001). Increased Adenosine Monophosphate-activated Protein Kinase activity in rat hearts with pressure-overload hypertrophy. *Circulation* **104**, 1664-1669.
- Tilney, L. G., Harb, O. S., Connelly, P. S., Robinson, C. G. and Roy, C. R.** (2001). How the parasitic bacterium *Legionella pneumophila* modifies its phagosome and transforms it into rough ER: implications for conversion of plasma membrane to the ER membrane. *J. Cell. Sci.* **114**, 4637-4650.
- Torija, P., Vicente, J. J., Rodrigues, T. B., Robles, A., Cerdán, S., Sastre, L., Calvo, R. M. and Escalante, R.** (2006). Functional genomics in *Dictyostelium*: MidA, a new conserved protein, is required for mitochondrial function and development. *J. Cell Sci.* **119**, 1154-1164.
- Vieira, O. V., Botelho, R. J. and Grinstein, S.** (2002). Phagosome maturation: aging gracefully. *Biochem. J.* **366**, 689-704.
- Wallace, D. C., Singh, G., Lott, M. T., Hodge, J. A., Schurr, T. G., Lezza, A. M., Elsas, L. J. and Nikoskelainen, E. K.** (1988). Mitochondrial DNA mutation associated with Leber's hereditary optic neuropathy. *Science* **242**, 1427-1430.
- Weber, S. S., Ragaz, C., Reus, K., Nyfeler, Y. and Hilbi, H.** (2006). *Legionella pneumophila* exploits PI(4)P to anchor secreted effector proteins to the replicative vacuole. *PLoS Pathog.* **2**, e46.
- Wiater, L. A., Sadosky, A. B. and Shuman, H. A.** (1994). Mutagenesis of *Legionella pneumophila* using Tn903 dIIIacZ: identification of a growth-phase-regulated pigmentation gene. *Mol. Microbiol.* **11**, 641-653.
- Wilczynska, Z., Barth, C. and Fisher, P. R.** (1997). Mitochondrial mutations impair signal transduction in *Dictyostelium discoideum* slugs. *Biochem. Biophys. Res. Comm.* **234**, 39-43.
- Wintermeyer, E., Ludwig, B., Steinert, M., Schmidt, B., Fischer, G. and Hacker, J.** (1995). Influence of site specifically altered Mip proteins on intracellular survival of *Legionella pneumophila* in eukaryotic cells. *Infect. Immun.* **63**, 4576-4583.
- Worth, R. G., Kim, M. K., Kindzelskii, A. L., Petty, H. R. and Schreiber, A. D.** (2003). Signal sequence within FcγRIIA controls calcium wave propagation patterns: apparent role in phagolysosome fusion. *Proc. Natl. Acad. Sci. USA* **100**, 4533-4538.
- Wortmann, S., Rodenburg, R. J. T., Huizing, M., Loupatty, F. J., de Koning, T., Kluijtmans, L. A. J., Engelke, U., Wevers, R., Smeitink, J. A. M. and Morava, E.** (2006). Association of 3-methylglutaconic aciduria with sensori-neural deafness, encephalopathy, and Leigh-like syndrome (MEGDEL association) in four patients with a disorder of the oxidative phosphorylation. *Mol. Genet. Metab.* **88**, 47-52.
- Zaborina, O., Li, X., Cheng, G., Kapatral, V. and Chakrabarty, A. M.** (1999). Secretion of ATP-utilizing enzymes, nucleoside diphosphate kinase and ATPase, by *Mycobacterium bovis* BCG: sequestration of ATP from macrophage P2Z receptors? *Mol. Microbiol.* **31**, 1333-1343.
- Zhou, G., Myers, R., Li, Y., Chen, Y., Shen, X., Fenyk-Melody, J., Wu, M., Ventre, J., Doebber, T., Fujii, N. et al.** (2001). Role of AMP-activated protein kinase in mechanism of metformin action. *J. Clin. Invest.* **108**, 1167-1174.
- Zong, H., Ren, J. M., Young, L. H., Pypaert, M., Mu, J., Birnbaum, M. J. and Shulman, G. I.** (2002). AMP kinase is required for mitochondrial biogenesis in skeletal muscle in response to chronic energy deprivation. *Proc. Natl. Acad. Sci. USA* **99**, 15983-15987.
